# Supplementary material
Source: PubMed Central journal article supplement (PMC4277325)
Supplement: ijc0135-1625-sd2.pdf [file ijc0135-1625-sd2.pdf]

| No.  | rs         | Chromosome | Position  | Allele        | TFBS | Splicing(site) | Splicing(ESE) | Splicing(abolimRNA) | mRNA(miRNA) | RNAi(RNA) | SangensSNP | Stop Codon | Polyphen | SNPs3D(svm) | SNPs3D(svm) | RegPotential | Conservator | Nearby Gene        | Distance (bp) | Allele | CEU |
|------|------------|------------|-----------|---------------|------|----------------|---------------|---------------------|-------------|-----------|------------|------------|----------|-------------|-------------|--------------|-------------|--------------------|---------------|--------|-----|
| 862  | rs57494578 | 1          | 224659702 | G/A           | --   | --             | --            | --                  | --          | --        | --         | --         | --       | NA          | NA          | NA           | 0.000       | PARP1              | 42009 5400--  | --     |     |
| 438  | rs3219027  | 1          | 224659706 | G/A           | --   | --             | --            | --                  | --          | --        | --         | --         | --       | NA          | 0           | 0.001        | PARP1       | 42021 5387G        | 0.79          |        |     |
| 437  | rs3219026  | 1          | 224659739 | G/A           | --   | --             | --            | --                  | --          | --        | --         | --         | --       | 0.23308     | 0           | 0.000        | PARP1       | 42324 5088G        | --            |        |     |
| 436  | rs3219025  | 1          | 224659739 | T/C           | --   | --             | --            | --                  | --          | --        | --         | --         | --       | 0.015174    | 0           | 0.000        | PARP1       | 42382 5022C        | --            |        |     |
| 403  | rs2793657  | 1          | 224659739 | T/C           | --   | --             | --            | --                  | --          | --        | --         | --         | --       | NA          | 0           | 0.000        | PARP1       | 42580 4822T        | --            |        |     |
| 435  | rs3219024  | 1          | 224659762 | G/A           | --   | --             | --            | --                  | --          | --        | --         | --         | --       | NA          | 0           | 0.000        | PARP1       | 42605 4802G        | --            |        |     |
| 434  | rs3219023  | 1          | 224659767 | T/C           | --   | --             | --            | --                  | --          | --        | --         | --         | --       | NA          | 0           | 0.000        | PARP1       | 42664 4742T        | --            |        |     |
| 433  | rs3219022  | 1          | 224659774 | T/C           | --   | --             | --            | --                  | --          | --        | --         | --         | --       | NA          | 0.003       | 0.000        | PARP1       | 42729 4682C        | --            |        |     |
| 432  | rs3219021  | 1          | 224659775 | G/A           | --   | --             | --            | --                  | --          | --        | --         | --         | --       | NA          | 0.002       | 0.000        | PARP1       | 42730 4677G        | --            |        |     |
| 431  | rs3219020  | 1          | 224659751 | G/C           | --   | --             | --            | --                  | --          | --        | --         | --         | --       | NA          | 0.001       | 0.000        | PARP1       | 42736 4672C        | --            |        |     |
| 430  | rs3219019  | 1          | 224659786 | G/A           | --   | --             | --            | --                  | --          | --        | --         | --         | --       | 0           | 0           | 0.000        | PARP1       | 42846 4562G        | --            |        |     |
| 247  | rs1417765  | 1          | 224659786 | G/T           | --   | --             | --            | --                  | --          | --        | --         | --         | --       | 0           | 0           | 0.000        | PARP1       | 42851 4552T        | --            |        |     |
| 12   | rs10623441 | 1          | 224658498 | -TC           | --   | --             | --            | --                  | --          | --        | --         | --         | --       | 0           | 0           | 0.000        | PARP1       | 43483 3921--       | --            |        |     |
| 14   | rs10638218 | 1          | 224658499 | -CT/TC        | --   | --             | --            | --                  | --          | --        | --         | --         | --       | 0           | 0           | 0.000        | PARP1       | 43484 3921--       | --            |        |     |
| 678  | rs35669638 | 1          | 224658500 | -CT           | --   | --             | --            | --                  | --          | --        | --         | --         | --       | 0           | 0           | 0.000        | PARP1       | 43485 3921--       | --            |        |     |
| 716  | rs3754370  | 1          | 224658503 | G/A           | --   | --             | --            | --                  | --          | --        | --         | --         | --       | 0.181648    | 0.001       | 0.000        | PARP1       | 43886 3522G        | --            |        |     |
| 713  | rs3729550  | 1          | 224659345 | G/C           | --   | --             | --            | --                  | --          | --        | --         | --         | --       | 0.176221    | 0.024       | 0.000        | PARP1       | 44130 3272--       | --            |        |     |
| 721  | rs3768347  | 1          | 224659368 | G/A           | --   | --             | --            | --                  | --          | --        | --         | --         | --       | 0.153984    | 0.079       | 0.000        | PARP1       | 44353 3051G        | 0.775         |        |     |
| 632  | rs34953974 | 1          | 224659474 | -CA           | --   | --             | --            | --                  | --          | --        | --         | --         | --       | 0.040882    | 0.001       | 0.000        | PARP1       | 44459 2951--       | --            |        |     |
| 720  | rs3768346  | 1          | 224659477 | T/C           | --   | --             | --            | --                  | --          | --        | --         | --         | --       | 0.057848    | 0           | 0.000        | PARP1       | 44462 2941--       | --            |        |     |
| 300  | rs184366   | 1          | 224659702 | A/C           | --   | --             | --            | --                  | --          | --        | --         | --         | --       | 0.001       | 0.000       | 0.000        | PARP1       | 44687 2722A        | --            |        |     |
| 391  | rs2695243  | 1          | 224659764 | C/A           | --   | --             | --            | --                  | --          | --        | --         | --         | --       | NA          | 0.001       | 0.000        | PARP1       | 44749 2661--       | --            |        |     |
| 155  | rs1219288  | 1          | 224659776 | C/T           | --   | --             | --            | --                  | --          | --        | --         | --         | --       | NA          | 0.001       | 0.000        | PARP1       | 44751 2661--       | --            |        |     |
| 1128 | rs7522351  | 1          | 224659891 | A/C           | --   | --             | --            | --                  | --          | --        | --         | --         | --       | NA          | 0.001       | 0.000        | PARP1       | 44876 2531--       | --            |        |     |
| 1138 | rs7525191  | 1          | 224659894 | G/T           | --   | --             | --            | --                  | --          | --        | --         | --         | --       | NA          | 0.001       | 0.000        | PARP1       | 44879 2531--       | --            |        |     |
| 258  | rs167591   | 1          | 224660054 | G/T           | --   | --             | --            | --                  | --          | --        | --         | --         | --       | NA          | 0.015       | 0.000        | PARP1       | 45039 2371--       | --            |        |     |
| 908  | rs58547335 | 1          | 224660576 | C/G           | --   | --             | --            | --                  | --          | --        | --         | --         | --       | NA          | NA          | 0.000        | PARP1       | 45561 1841--       | --            |        |     |
| 259  | rs167592   | 1          | 224660605 | G/T           | --   | --             | --            | --                  | --          | --        | --         | --         | --       | 0           | 0           | 0.000        | PARP1       | 45590 1815--       | --            |        |     |
| 390  | rs2695242  | 1          | 224660661 | T/G           | --   | --             | --            | --                  | --          | --        | --         | --         | --       | 0           | 0           | 0.000        | PARP1       | 45646 1761--       | --            |        |     |
| 753  | rs444602   | 1          | 224660679 | C/G           | --   | --             | --            | --                  | --          | --        | --         | --         | --       | 0           | 0           | 0.000        | PARP1       | 45664 1761--       | --            |        |     |
| 769  | rs4653732  | 1          | 224660729 | C/G           | --   | --             | --            | --                  | --          | --        | --         | --         | --       | 0           | 0           | 0.000        | PARP1       | 45714 1691--       | --            |        |     |
| 301  | rs184367   | 1          | 224660738 | C/G           | --   | --             | --            | --                  | --          | --        | --         | --         | --       | 0           | 0.004       | 0.000        | PARP1       | 45723 1681--       | --            |        |     |
| 426  | rs317209   | 1          | 224660818 | C/G           | --   | --             | --            | --                  | --          | --        | --         | --         | --       | 0           | 0           | 0.000        | PARP1       | 45803 1602C        | --            |        |     |
| 278  | rs178439   | 1          | 224660874 | A/C/G         | --   | --             | --            | --                  | --          | --        | --         | --         | --       | 0.079404    | 0           | 0.000        | PARP1       | 45859 1551--       | --            |        |     |
| 336  | rs2048426  | 1          | 224660924 | C/T           | --   | --             | --            | --                  | --          | --        | --         | --         | --       | 0           | 0           | 0.000        | PARP1       | 45909 1502T        | --            |        |     |
| 758  | rs453739   | 1          | 224660932 | A/T           | --   | --             | --            | --                  | --          | --        | --         | --         | --       | 0           | 0.001       | 0.000        | PARP1       | 45917 1491--       | --            |        |     |
| 754  | rs453632   | 1          | 224660933 | A/G           | --   | --             | --            | --                  | --          | --        | --         | --         | --       | 0           | 0.001       | 0.000        | PARP1       | 45918 1491--       | --            |        |     |
| 1210 | rs9282580  | 1          | 224660995 | T/C           | --   | --             | --            | --                  | --          | --        | --         | --         | --       | 0           | 0.005       | 0.000        | PARP1       | 45980 1421--       | --            |        |     |
| 1209 | rs9282579  | 1          | 224661029 | C/A           | --   | --             | --            | --                  | --          | --        | --         | --         | --       | 0           | 0           | 0.000        | PARP1       | 46014 1391--       | --            |        |     |
| 770  | rs4653733  | 1          | 224661236 | A/G           | --   | --             | --            | --                  | --          | --        | --         | --         | --       | 0           | 0           | 0.000        | PARP1       | 46221 1181--       | --            |        |     |
| 975  | rs60698376 | 1          | 224661480 | C/T           | Y    | --             | --            | --                  | --          | --        | --         | --         | --       | NA          | NA          | 0.000        | PARP1       | 46465 941--        | --            |        |     |
| 134  | rs12041725 | 1          | 224661616 | C/G           | Y    | --             | --            | --                  | --          | --        | --         | --         | --       | 0.094031    | 0           | 0.000        | PARP1       | 46601 808G         | 1             |        |     |
| 77   | rs11399292 | 1          | 224661705 | -G            | --   | --             | --            | --                  | --          | --        | --         | --         | --       | 0.012813    | 0.001       | 0.000        | PARP1       | 46690 719--        | --            |        |     |
| 1197 | rs923248   | 1          | 224662000 | C/G           | Y    | --             | --            | --                  | --          | --        | --         | --         | --       | 0.763661    | 0           | 0.000        | PARP1       | 46958 1461--       | --            |        |     |
| 771  | rs4653734  | 1          | 224662012 | C/G           | Y    | --             | --            | --                  | --          | --        | --         | --         | --       | 0.693408    | 0.001       | 0.000        | PARP1       | 46997 412--        | --            |        |     |
| 414  | rs3046771  | 1          | 224662031 | -CCGGCC       | --   | --             | --            | --                  | --          | --        | --         | --         | --       | 0.595055    | 0           | 0.000        | PARP1       | 47016 393--        | --            |        |     |
| 85   | rs11541662 | 1          | 224662259 | G/C           | Y    | --             | Y             | --                  | --          | --        | --         | --         | --       | 0.353231    | 0           | 0.000        | PARP1       | 47244 165--        | --            |        |     |
| 1201 | rs907187   | 1          | 224662270 | G/C           | Y    | --             | Y             | --                  | --          | --        | --         | --         | --       | 0.316598    | 0           | 0.000        | PARP1       | 47255 154--        | --            |        |     |
| 413  | rs3046769  | 1          | 224662473 | -CG           | --   | --             | --            | --                  | --          | --        | --         | --         | --       | 0.885448    | 0.001       | 0.000        | PARP1       | [LOC-49] -30412--  | --            |        |     |
| 584  | rs34243532 | 1          | 224662518 | -C            | --   | --             | --            | --                  | --          | --        | --         | --         | --       | 0.003535    | 0           | 0.000        | PARP1       | [LOC-94] -30367--  | --            |        |     |
| 1143 | rs7531568  | 1          | 224662642 | T/A           | Y    | --             | --            | --                  | --          | --        | --         | --         | --       | NA          | 0           | 0.000        | PARP1       | [LOC-218] -3024--  | --            |        |     |
| 340  | rs2077197  | 1          | 224662662 | T/C           | Y    | --             | --            | --                  | --          | --        | --         | --         | --       | NA          | 0.001       | 0.000        | PARP1       | [LOC-238] -3022--  | --            |        |     |
| 1139 | rs7527192  | 1          | 224662702 | C/T           | Y    | --             | --            | --                  | --          | --        | --         | --         | --       | NA          | 0           | 0.000        | PARP1       | [LOC-278] -3018--  | --            |        |     |
| 245  | rs1341336  | 1          | 224663012 | A/G           | Y    | --             | --            | --                  | --          | --        | --         | --         | --       | NA          | 0           | 0.000        | PARP1       | [LOC-588] -2987--  | --            |        |     |
| 395  | rs2793379  | 1          | 224663309 | T/A           | Y    | --             | --            | --                  | --          | --        | --         | --         | --       | NA          | 0           | 0.000        | PARP1       | [LOC-885] -29571-- | --            |        |     |
| 419  | rs3138526  | 1          | 224663356 | (GT)TA/TG/T-- | --   | --             | --            | --                  | --          | --        | --         | --         | --       | NA          | NA          | 0.000        | PARP1       | [LOC-932] -29521-- | --            |        |     |
| 73   | rs11366269 | 1          | 224663570 | -T/C          | --   | --             | --            | --                  | --          | --        | --         | --         | --       | 0           | 0.005       | 0.000        | PARP1       | [LOC-1146] -2921-- | --            |        |     |
| 394  | rs2793378  | 1          | 224663964 | G/A           | Y    | --             | --            | --                  | --          | --        | --         | --         | --       | NA          | 0           | 0.000        | PARP1       | [LOC-1540] -289--  | --            |        |     |
| 99   | rs11586483 | 1          | 224664041 | A/C           | Y    | --             | --            | --                  | --          | --        | --         | --         | --       | 0           | 0.006       | 0.000        | PARP1       | [LOC-1617]-288--   | --            |        |     |
| 703  | rs35987443 | 1          | 224664073 | -AA           | --   | --             | --            | --                  | --          | --        | --         | --         | --       | 0           | 0.051       | 0.000        | PARP1       | [LOC-1649]-288--   | --            |        |     |
| 910  | rs58631707 | 1          | 224664074 | -A            | --   | --             | --            | --                  | --          | --        | --         | --         | --       | NA          | NA          | 0.000        | PARP1       | [LOC-1650]-288--   | --            |        |     |
| 944  | rs59672299 | 1          | 224664216 | C/T           | Y    | --             | --            | --                  | --          | --        | --         | --         | --       | NA          | NA          | 0.000        | PARP1       | [LOC-1792]-2861--  | --            |        |     |
| 641  | rs35077341 | 1          | 224664443 | -G            | --   | --             | --            | --                  | --          | --        | --         | --         | --       | NA          | 0           | 0.000        | PARP1       | [LOC-2019]-284--   | --            |        |     |
| 821  | rs6003519  | 1          | 224664538 | -T/C          | Y    | --             | --            | --                  | --          | --        | --         | --         | --       | NA          | NA          | 0.000        | PARP1       | [LOC-2114]-283--   | --            |        |     |
| 811  | rs5820045  | 1          | 224664539 | A/C           | Y    | --             | --            | --                  | --          | --        | --         | --         | --       | NA          | NA          | 0.000        | PARP1       | [LOC-2115]-283--   | --            |        |     |
| 219  | rs12759826 | 1          | 224664873 | G/T           | Y    | --             | --            | --                  | --          | --        | --         | --         | --       | NA          | 0.001       | 0.000        | PARP1       | [LOC-2449]-280--   | --            |        |     |
| 224  | rs1317170  | 1          | 224664937 | T/C           | Y    | --             | --            | --                  | --          | --        | --         | --         | --       | 0.102585    | 0.001       | 0.000        | PARP1       | [LOC-2513]-279--   | --            |        |     |
| 1020 | rs61835405 | 1          | 224665150 | A/T           | Y    | --             | --            | --                  | --          | --        | --         | --         | --       | NA          | NA          | 0.000        | PARP1       | [LOC-2726]-2771--  | --            |        |     |
| 60   | rs1104893  | 1          | 224665275 | G/A           | Y    | --             | --            | --                  | --          | --        | --         | --         | --       | 0           | 0.004       | 0.000        | PARP1       | [LOC-2851]-276G    | --            |        |     |
| 1056 | rs6664695  | 1          | 224665459 | C/T           | Y    | --             | --            | --                  | --          | --        | --         | --         | --       | NA          | 0.72        | 0.000        | PARP1       | [LOC-3035]-274--   | --            |        |     |

| No.  | rs         | Chromosome | Position  | Allele | TFBS | Splicing(site) | Splicing(ESE) | Splicing(abolimiRNA) | miRaimiRNA | (miRaimiRNA) | (Sangens)SNP | Stop Codon | Polyphen | SNPs3D(sv | SNPs3D(sv | RegPotential | Conservator | Nearby Gene | Distance (bp)      | Allele           | CEU   |
|------|------------|------------|-----------|--------|------|----------------|---------------|----------------------|------------|--------------|--------------|------------|----------|-----------|-----------|--------------|-------------|-------------|--------------------|------------------|-------|
| 690  | rs35789667 | 1          | 224672564 | -T     | ..   | ..             | ..            | ..                   | ..         | ..           | ..           | ..         | ..       | ..        | ..        | 0            | 0.001       | PARP1       | [LOC-10140]  -20-  | ..               | ..    |
| 18   | rs10690709 | 1          | 224672839 | -TTT   | ..   | ..             | ..            | ..                   | ..         | ..           | ..           | ..         | ..       | ..        | ..        | NA           | 0           | PARP1       | [LOC-10415]  -20-  | ..               | ..    |
| 346  | rs2136875  | 1          | 224673159 | G/A    | ..   | ..             | ..            | ..                   | ..         | ..           | ..           | ..         | ..       | ..        | ..        | NA           | 0           | 0.001       | PARP1              | [LOC-10735]  -14 | 0.417 |
| 388  | rs2695240  | 1          | 224673959 | C/T    | ..   | ..             | ..            | ..                   | ..         | ..           | ..           | ..         | ..       | ..        | ..        | 0            | 0           | PARP1       | [LOC-11535]  -18-  | ..               | ..    |
| 654  | rs35265774 | 1          | 224673964 | -G     | ..   | ..             | ..            | ..                   | ..         | ..           | ..           | ..         | ..       | ..        | ..        | 0.010194     | 0           | PARP1       | [LOC-11540]  -18-  | ..               | ..    |
| 380  | rs2570370  | 1          | 224674008 | C/T    | ..   | ..             | ..            | ..                   | ..         | ..           | ..           | ..         | ..       | ..        | ..        | 0            | 0.002       | PARP1       | [LOC-11584]  -18-  | ..               | ..    |
| 1058 | rs6665016  | 1          | 224674039 | A/G    | ..   | ..             | ..            | ..                   | ..         | ..           | ..           | ..         | ..       | ..        | ..        | 0            | 0           | PARP1       | [LOC-11615]  -18-  | ..               | ..    |
| 389  | rs2695241  | 1          | 224674219 | A/G    | ..   | ..             | ..            | ..                   | ..         | ..           | ..           | ..         | ..       | ..        | ..        | 0            | 0.001       | PARP1       | [LOC-11795]  -18-G | 1                | ..    |
| 302  | rs1858548  | 1          | 224674397 | G/A    | ..   | ..             | ..            | ..                   | ..         | ..           | ..           | ..         | ..       | ..        | ..        | 0            | 0.179       | PARP1       | [LOC-11973]  -18-  | ..               | ..    |
| 660  | rs3380305  | 1          | 224674400 | -C     | ..   | ..             | ..            | ..                   | ..         | ..           | ..           | ..         | ..       | ..        | ..        | 0            | 0.049       | PARP1       | [LOC-11996]  -18-  | ..               | ..    |
| 303  | rs1858549  | 1          | 224674515 | -G/A   | ..   | ..             | ..            | ..                   | ..         | ..           | ..           | ..         | ..       | ..        | ..        | 0.046514     | 0.028       | PARP1       | [LOC-12091]  -18-A | 0.417            | ..    |
| 941  | rs59618121 | 1          | 224674515 | -A/G   | ..   | ..             | ..            | ..                   | ..         | ..           | ..           | ..         | ..       | ..        | ..        | 0.046514     | 0.028       | PARP1       | [LOC-12091]  -18-  | ..               | ..    |
| 921  | rs59036230 | 1          | 224674594 | -TTT   | ..   | ..             | ..            | ..                   | ..         | ..           | ..           | ..         | ..       | ..        | ..        | NA           | NA          | PARP1       | [LOC-12170]  -18-  | ..               | ..    |
| 896  | rs58202712 | 1          | 224674658 | C/T    | ..   | ..             | ..            | ..                   | ..         | ..           | ..           | ..         | ..       | ..        | ..        | NA           | NA          | PARP1       | [LOC-12234]  -18-  | ..               | ..    |
| 304  | rs1858550  | 1          | 224674727 | C/A    | ..   | ..             | ..            | ..                   | ..         | ..           | ..           | ..         | ..       | ..        | ..        | 0            | 0.006       | PARP1       | [LOC-12303]  -18-  | ..               | ..    |
| 849  | rs17031383 | 1          | 224674757 | G/T    | ..   | ..             | ..            | ..                   | ..         | ..           | ..           | ..         | ..       | ..        | ..        | NA           | NA          | PARP1       | [LOC-12333]  -18-  | ..               | ..    |
| 855  | rs5724252  | 1          | 224675256 | -TTTTT | ..   | ..             | ..            | ..                   | ..         | ..           | ..           | ..         | ..       | ..        | ..        | NA           | NA          | PARP1       | [LOC-12832]  -17-  | ..               | ..    |
| 590  | rs34304692 | 1          | 224675737 | -G     | ..   | ..             | ..            | ..                   | ..         | ..           | ..           | ..         | ..       | ..        | ..        | NA           | 0.022       | PARP1       | [LOC-13313]  -17-  | ..               | ..    |
| 248  | rs1433574  | 1          | 224675962 | A/C    | ..   | ..             | ..            | ..                   | ..         | ..           | ..           | ..         | ..       | ..        | ..        | 0            | 0           | PARP1       | [LOC-13538]  -16-  | ..               | ..    |
| 1075 | rs6681537  | 1          | 224676059 | C/T    | ..   | ..             | ..            | ..                   | ..         | ..           | ..           | ..         | ..       | ..        | ..        | 0            | 0.001       | PARP1       | [LOC-13635]  -16-  | ..               | ..    |
| 675  | rs35621952 | 1          | 224676421 | -G     | ..   | ..             | ..            | ..                   | ..         | ..           | ..           | ..         | ..       | ..        | ..        | 0            | 0           | PARP1       | [LOC-13997]  -16-  | ..               | ..    |
| 840  | rs56340195 | 1          | 224676738 | -T     | ..   | ..             | ..            | ..                   | ..         | ..           | ..           | ..         | ..       | ..        | ..        | NA           | NA          | PARP1       | [LOC-14314]  -16-  | ..               | ..    |
| 42   | rs10915988 | 1          | 224677087 | A/G    | ..   | ..             | ..            | ..                   | ..         | ..           | ..           | ..         | ..       | ..        | ..        | 0.001667     | 0           | PARP1       | [LOC-14663]  -15-A | 0.75             | ..    |
| 422  | rs172705   | 1          | 224677124 | A/G    | ..   | ..             | ..            | ..                   | ..         | ..           | ..           | ..         | ..       | ..        | ..        | 0            | 0           | PARP1       | [LOC-14700]  -15-  | ..               | ..    |
| 328  | rs2039925  | 1          | 224677135 | C/G    | ..   | ..             | ..            | ..                   | ..         | ..           | ..           | ..         | ..       | ..        | ..        | 0.019267     | 0           | PARP1       | [LOC-14711]  -15-C | 0.815            | ..    |
| 423  | rs317206   | 1          | 224677144 | G/A    | ..   | ..             | ..            | ..                   | ..         | ..           | ..           | ..         | ..       | ..        | ..        | 0.032859     | 0           | PARP1       | [LOC-14720]  -15-  | ..               | ..    |
| 945  | rs59716048 | 1          | 224677249 | A/G    | ..   | ..             | ..            | ..                   | ..         | ..           | ..           | ..         | ..       | ..        | ..        | NA           | NA          | PARP1       | [LOC-14825]  -15-  | ..               | ..    |
| 43   | rs10915989 | 1          | 224677261 | A/G    | ..   | ..             | ..            | ..                   | ..         | ..           | ..           | ..         | ..       | ..        | ..        | 0            | 0.002       | PARP1       | [LOC-14837]  -15-G | 0.754            | ..    |
| 44   | rs10915990 | 1          | 224677374 | G/T    | ..   | ..             | ..            | ..                   | ..         | ..           | ..           | ..         | ..       | ..        | ..        | 0            | 0.01        | PARP1       | [LOC-14950]  -15-  | ..               | ..    |
| 45   | rs10915991 | 1          | 224677382 | A/G    | ..   | ..             | ..            | ..                   | ..         | ..           | ..           | ..         | ..       | ..        | ..        | 0            | 0.002       | PARP1       | [LOC-14959]  -15-  | ..               | ..    |
| 927  | rs59209678 | 1          | 224677462 | G/T    | ..   | ..             | ..            | ..                   | ..         | ..           | ..           | ..         | ..       | ..        | ..        | NA           | NA          | PARP1       | [LOC-15038]  -15-  | ..               | ..    |
| 46   | rs10915992 | 1          | 224677627 | A/C    | ..   | ..             | ..            | ..                   | ..         | ..           | ..           | ..         | ..       | ..        | ..        | 0            | 0.045       | PARP1       | [LOC-15203]  -15-  | ..               | ..    |
| 105  | rs11800592 | 1          | 224677764 | A/G    | ..   | ..             | ..            | ..                   | ..         | ..           | ..           | ..         | ..       | ..        | ..        | 0.064295     | 0.145       | PARP1       | [LOC-15340]  -15-G | 1                | ..    |
| 117  | rs11811928 | 1          | 224677803 | A/C    | ..   | ..             | ..            | ..                   | ..         | ..           | ..           | ..         | ..       | ..        | ..        | 0.286565     | 0.001       | PARP1       | [LOC-15379]  -15-  | ..               | ..    |
| 254  | rs1527365  | 1          | 224677986 | T/C    | ..   | ..             | ..            | ..                   | ..         | ..           | ..           | ..         | ..       | ..        | ..        | NA           | 0           | PARP1       | [LOC-15562]  -14-C | 0.817            | ..    |
| 253  | rs1527364  | 1          | 224678055 | T/C    | ..   | ..             | ..            | ..                   | ..         | ..           | ..           | ..         | ..       | ..        | ..        | NA           | 0           | PARP1       | [LOC-15631]  -14-  | ..               | ..    |
| 202  | rs12739788 | 1          | 224678105 | C/G    | ..   | ..             | ..            | ..                   | ..         | ..           | ..           | ..         | ..       | ..        | ..        | 0.123848     | 0.003       | PARP1       | [LOC-15691]  -13-  | ..               | ..    |
| 252  | rs1527363  | 1          | 224678128 | T/C    | ..   | ..             | ..            | ..                   | ..         | ..           | ..           | ..         | ..       | ..        | ..        | NA           | 0           | PARP1       | [LOC-15704]  -14-  | ..               | ..    |
| 200  | rs12738725 | 1          | 224678164 | C/G    | ..   | ..             | ..            | ..                   | ..         | ..           | ..           | ..         | ..       | ..        | ..        | NA           | 0           | PARP1       | [LOC-15740]  -14-  | ..               | ..    |
| 829  | rs56081538 | 1          | 224678258 | A/G    | ..   | ..             | ..            | ..                   | ..         | ..           | ..           | ..         | ..       | ..        | ..        | NA           | NA          | PARP1       | [LOC-15834]  -14-  | ..               | ..    |
| 835  | rs56262620 | 1          | 224678262 | A/G    | ..   | ..             | ..            | ..                   | ..         | ..           | ..           | ..         | ..       | ..        | ..        | NA           | NA          | PARP1       | [LOC-15838]  -14-  | ..               | ..    |
| 196  | rs12729525 | 1          | 224678439 | A/T    | ..   | ..             | ..            | ..                   | ..         | ..           | ..           | ..         | ..       | ..        | ..        | NA           | 0           | PARP1       | [LOC-16015]  -14-  | ..               | ..    |
| 424  | rs1317207  | 1          | 224678481 | A/G    | ..   | ..             | ..            | ..                   | ..         | ..           | ..           | ..         | ..       | ..        | ..        | NA           | 0           | PARP1       | [LOC-16057]  -14-  | ..               | ..    |
| 120  | rs12022062 | 1          | 224678524 | A/G    | ..   | ..             | ..            | ..                   | ..         | ..           | ..           | ..         | ..       | ..        | ..        | NA           | 0           | PARP1       | [LOC-16100]  -14-  | ..               | ..    |
| 277  | rs178438   | 1          | 224678539 | C/T    | ..   | ..             | ..            | ..                   | ..         | ..           | ..           | ..         | ..       | ..        | ..        | NA           | 0           | PARP1       | [LOC-16151]  -14-  | ..               | ..    |
| 597  | rs34474228 | 1          | 224678606 | -A/G   | ..   | ..             | ..            | ..                   | ..         | ..           | ..           | ..         | ..       | ..        | ..        | NA           | 0           | PARP1       | [LOC-16182]  -14-  | ..               | ..    |
| 1076 | rs6681825  | 1          | 224678625 | A/G    | ..   | ..             | ..            | ..                   | ..         | ..           | ..           | ..         | ..       | ..        | ..        | NA           | 0           | PARP1       | [LOC-16201]  -14-  | ..               | ..    |
| 124  | rs12025226 | 1          | 224678646 | A/G    | ..   | ..             | ..            | ..                   | ..         | ..           | ..           | ..         | ..       | ..        | ..        | NA           | 0.001       | PARP1       | [LOC-16222]  -14-G | 0.808            | ..    |
| 131  | rs12032713 | 1          | 224678909 | C/T    | ..   | ..             | ..            | ..                   | ..         | ..           | ..           | ..         | ..       | ..        | ..        | 0.052747     | 0           | PARP1       | [LOC-16485]  -13-  | ..               | ..    |
| 845  | rs56808869 | 1          | 224678983 | C/T    | ..   | ..             | ..            | ..                   | ..         | ..           | ..           | ..         | ..       | ..        | ..        | NA           | NA          | PARP1       | [LOC-16559]  -13-  | ..               | ..    |
| 1181 | rs7515972  | 1          | 224679020 | A/T    | ..   | ..             | ..            | ..                   | ..         | ..           | ..           | ..         | ..       | ..        | ..        | 0.123848     | 0.003       | PARP1       | [LOC-16591]  -13-  | ..               | ..    |
| 1176 | rs7549176  | 1          | 224679022 | A/G    | ..   | ..             | ..            | ..                   | ..         | ..           | ..           | ..         | ..       | ..        | ..        | 0.076893     | 0           | PARP1       | [LOC-16598]  -13-  | ..               | ..    |
| 1006 | rs61573918 | 1          | 224679159 | A/T    | ..   | ..             | ..            | ..                   | ..         | ..           | ..           | ..         | ..       | ..        | ..        | NA           | NA          | PARP1       | [LOC-16735]  -13-  | ..               | ..    |
| 738  | rs4012809  | 1          | 224679413 | T/G    | ..   | ..             | ..            | ..                   | ..         | ..           | ..           | ..         | ..       | ..        | ..        | 0.029645     | 0           | PARP1       | [LOC-16989]  -13-  | ..               | ..    |
| 954  | rs60015076 | 1          | 224679418 | -T     | ..   | ..             | ..            | ..                   | ..         | ..           | ..           | ..         | ..       | ..        | ..        | NA           | NA          | PARP1       | [LOC-16994]  -13-  | ..               | ..    |
| 1202 | rs907188   | 1          | 224679449 | T/G    | ..   | ..             | ..            | ..                   | ..         | ..           | ..           | ..         | ..       | ..        | ..        | 0.262518     | 0.001       | PARP1       | [LOC-17025]  -13-G | 0.254            | ..    |
| 1200 | rs907186   | 1          | 224679572 | G/A    | ..   | ..             | ..            | ..                   | ..         | ..           | ..           | ..         | ..       | ..        | ..        | 0            | 0.002       | PARP1       | [LOC-17148]  -13-A | 0.254            | ..    |
| 960  | rs60232080 | 1          | 224679615 | A/G    | ..   | ..             | ..            | ..                   | ..         | ..           | ..           | ..         | ..       | ..        | ..        | NA           | NA          | PARP1       | [LOC-17191]  -13-  | ..               | ..    |
| 1171 | rs7547592  | 1          | 224679674 | C/G    | ..   | ..             | ..            | ..                   | ..         | ..           | ..           | ..         | ..       | ..        | ..        | NA           | 0           | PARP1       | [LOC-17250]  -13-  | ..               | ..    |
| 1184 | rs7554919  | 1          | 224679749 | C/T    | ..   | ..             | ..            | ..                   | ..         | ..           | ..           | ..         | ..       | ..        | ..        | NA           | 0           | PARP1       | [LOC-17325]  -13-  | ..               | ..    |
| 132  | rs12033673 | 1          | 224679851 | A/C    | ..   | ..             | ..            | ..                   | ..         | ..           | ..           | ..         | ..       | ..        | ..        | NA           | 0           | PARP1       | [LOC-17427]  -13-  | ..               | ..    |
| 1039 | rs6426461  | 1          | 224679856 | C/T    | ..   | ..             | ..            | ..                   | ..         | ..           | ..           | ..         | ..       | ..        | ..        | NA           | 0           | PARP1       | [LOC-17432]  -13-T | 0.549            | ..    |
| 763  | rs4653448  | 1          | 224679910 | A/G    | ..   | ..             | ..            | ..                   | ..         | ..           | ..           | ..         | ..       | ..        | ..        | NA           | 0           | PARP1       | [LOC-17486]  -12-  | ..               | ..    |
| 764  | rs4653449  | 1          | 224679942 | C/G    | ..   | ..             | ..            | ..                   | ..         | ..           | ..           | ..         | ..       | ..        | ..        | NA           | 0           | PARP1       | [LOC-17518]  -12-  | ..               | ..    |
| 773  | rs4653737  | 1          | 224680022 | G/T    | ..   | ..             | ..            | ..                   | ..         | ..           | ..           | ..         | ..       | ..        | ..        | NA           | 0           | PARP1       | [LOC-17571]  -12-T | 0.772            | ..    |
| 579  | rs34185854 | 1          | 224680042 | C/T    | ..   | ..             | ..            | ..                   | ..         | ..           | ..           | ..         | ..       | ..        | ..        | NA           | 0           | PARP1       | [LOC-17618]  -12-  | ..               | ..    |
| 122  | rs12023172 | 1          | 224680076 | A/G    | ..   | ..             | ..            | ..                   | ..         | ..           | ..           | ..         | ..       | ..        | ..        | NA           | 0           | PARP1       | [LOC-17652]  -12-  | ..               | ..    |
| 1040 | rs6426465  | 1          | 224680112 | A/T    | ..   | ..             | ..            | ..                   | ..         | ..           | ..           | ..         | ..       | ..        | ..        | NA           | 0           | PARP1       | [LOC-17688]  -12-  | ..               | ..    |
| 90   | rs11578773 | 1          | 224680293 | A/G    | ..   | ..             | ..            | ..                   | ..         | ..           | ..           | ..         | ..       | ..        | ..        | NA           | 0           | PARP1       | [LOC-17869]  -12-  | ..               | ..    |
| 1119 | rs7512686  | 1          | 224680396 | C/T    | ..   | ..             | ..            | ..                   | ..         | ..           | ..           | ..         | ..       | ..        | ..        | NA           | 0           | PARP1       | [LOC-17972]  -12-  | ..               | ..    |
| 24   | rs10753424 | 1          | 224680574 | A/G    | ..   | ..             | ..            | ..                   | ..         | ..           | ..           | ..         | ..       | ..        | ..        | NA           | 0           | PARP1       | [LOC-18150]  -12-  | ..               | ..    |
| 1178 | rs7550586  | 1          | 224680605 | C/T    | ..   | ..             |               |                      |            |              |              |            |          |           |           |              |             |             |                    |                  |       |

| No.  | rs          | Chromosome | Position  | Allele     | TFBS | Splicing(site) | Splicing(ESE) | Splicing(abolimRNA) | miRNA(miRaimiRNA) | SangensSNP | Stop Codon | Polyphen | SNPs3D(svm) | SNPs3D(svm) | RegPotential | Conservator | Nearby Gene | Distance (bp)    | Allele | CEU   |
|------|-------------|------------|-----------|------------|------|----------------|---------------|---------------------|-------------------|------------|------------|----------|-------------|-------------|--------------|-------------|-------------|------------------|--------|-------|
| 658  | rs35305887  | 1          | 224691841 | -T         | --   | --             | --            | --                  | --                | --         | --         | --       | --          | --          | NA           | 0.008       | PARP1       | LOC-29417  -10-- |        |       |
| 179  | rs12144990  | 1          | 224691844 | G/T        | Y    | --             | --            | --                  | --                | --         | --         | --       | --          | --          | NA           | 0.006       | PARP1       | LOC-29420  -10-T |        | 1     |
| 911  | rs5873325   | 1          | 224691999 | -/ACA      | --   | --             | --            | --                  | --                | --         | --         | --       | --          | --          | NA           | NA          | PARP1       | LOC-29511  -88-  |        |       |
| 886  | rs57870333  | 1          | 224692052 | C/T        | --   | --             | --            | --                  | --                | --         | --         | --       | --          | --          | NA           | NA          | PARP1       | LOC-30078  -38-- |        |       |
| 1148 | rs7534366   | 1          | 224692514 | C/T        | Y    | --             | --            | --                  | --                | --         | --         | --       | --          | --          | 0            | 0.085       | PARP1       | LOC-30090  -37-C |        | 0.491 |
| 351  | rs2175355   | 1          | 224692671 | A/C        | Y    | --             | --            | --                  | --                | --         | --         | --       | --          | --          | NA           | 0.957       | PARP1       | LOC-30247  -21-A |        | 1     |
| 181  | rs12145975  | 1          | 224692697 | C/T        | Y    | --             | --            | --                  | --                | --         | --         | --       | --          | --          | NA           | 0.896       | PARP1       | LOC-30273  -18-T |        | 0.558 |
| 592  | rs34359296  | 1          | 224692832 | -T         | --   | --             | --            | --                  | --                | --         | --         | --       | --          | --          | NA           | 0.362       | PARP1       | LOC-30408  -53-- |        |       |
| 1144 | rs7531792   | 1          | 224692900 | A/G        | Y    | --             | --            | --                  | --                | --         | --         | --       | --          | --          | NA           | 1           | LOC391168   | 151  80-A        |        | 0.482 |
| 1140 | rs7527596   | 1          | 224693197 | C/T        | Y    | --             | --            | --                  | --                | --         | --         | --       | --          | --          | 0.197233     | 1           | LOC391168   | 312  150-C       |        | 0.558 |
| 1177 | rs7549215   | 1          | 224693307 | A/G        | Y    | --             | --            | --                  | --                | --         | --         | --       | --          | --          | 0.191928     | 1           | LOC391168   | 422  394-G       |        | 0.558 |
| 1023 | rs61835410  | 1          | 224693654 | C/T        | Y    | --             | --            | --                  | --                | --         | --         | --       | --          | --          | NA           | NA          | LOC391168   | 769  47--        |        |       |
| 1124 | rs7517725   | 1          | 224693697 | A/G        | Y    | --             | --            | --                  | --                | --         | --         | --       | --          | --          | 0.090268     | 1           | LOC391168   | 812  4-A         |        | 0.486 |
| 49   | rs10915995  | 1          | 224694327 | C/T        | --   | --             | --            | --                  | --                | --         | --         | --       | --          | --          | NA           | 0.007       | LOC391168   | 626  -5247--     |        |       |
| 50   | rs10915996  | 1          | 224695097 | A/G        | --   | --             | --            | --                  | --                | --         | --         | --       | --          | --          | NA           | 0           | LOC391168   | -1396  -517--    |        |       |
| 51   | rs10915997  | 1          | 224695143 | C/T        | --   | --             | --            | --                  | --                | --         | --         | --       | --          | --          | NA           | 0           | LOC391168   | -1442  -516-T    |        | 0.55  |
| 775  | rs4653739   | 1          | 224695266 | A/C        | --   | --             | --            | --                  | --                | --         | --         | --       | --          | --          | NA           | 0           | LOC391168   | 1595  -515-A     |        | 1     |
| 885  | rs57823451  | 1          | 224695316 | G/T        | --   | --             | --            | --                  | --                | --         | --         | --       | --          | --          | NA           | NA          | LOC391168   | -1615  -514--    |        |       |
| 123  | rs12023492  | 1          | 224695588 | A/T        | --   | --             | --            | --                  | --                | --         | --         | --       | --          | --          | NA           | 0           | LOC391168   | -1887  -512-A    |        | 0.55  |
| 52   | rs10915998  | 1          | 224695741 | G/T        | --   | --             | --            | --                  | --                | --         | --         | --       | --          | --          | NA           | 0           | LOC391168   | -2040  -510--    |        |       |
| 599  | rs34507832  | 1          | 224695871 | A/G        | --   | --             | --            | --                  | --                | --         | --         | --       | --          | --          | NA           | 0           | LOC391168   | -2170  -509--    |        |       |
| 53   | rs10915999  | 1          | 224696127 | C/T        | --   | --             | --            | --                  | --                | --         | --         | --       | --          | --          | NA           | 0           | LOC391168   | -2426  -506-T    |        |       |
| 153  | rs1218824   | 1          | 224696279 | A/G        | --   | --             | --            | --                  | --                | --         | --         | --       | --          | --          | NA           | 0           | LOC391168   | -2578  -505-A    |        | 0.482 |
| 156  | rs1218957   | 1          | 224696505 | A/G        | --   | --             | --            | --                  | --                | --         | --         | --       | --          | --          | NA           | 0           | LOC391168   | -2801  -502--    |        |       |
| 161  | rs12122994  | 1          | 224696537 | A/G        | --   | --             | --            | --                  | --                | --         | --         | --       | --          | --          | NA           | 0           | LOC391168   | -2836  -502--    |        |       |
| 168  | rs12130731  | 1          | 224696562 | C/T        | --   | --             | --            | --                  | --                | --         | --         | --       | --          | --          | NA           | 0           | LOC391168   | -2861  -502--    |        |       |
| 671  | rs35551508  | 1          | 224696594 | -G         | --   | --             | --            | --                  | --                | --         | --         | --       | --          | --          | NA           | 0           | LOC391168   | -2893  -502--    |        |       |
| 1120 | rs7513977   | 1          | 224696602 | A/G        | --   | --             | --            | --                  | --                | --         | --         | --       | --          | --          | NA           | 0           | LOC391168   | -2901  -501--    |        |       |
| 1130 | rs7523063   | 1          | 224696681 | C/T        | --   | --             | --            | --                  | --                | --         | --         | --       | --          | --          | NA           | 0           | LOC391168   | -2980  -501--    |        |       |
| 187  | rs12035560  | 1          | 224696742 | A/G        | --   | --             | --            | --                  | --                | --         | --         | --       | --          | --          | NA           | 0.004       | LOC391168   | -3041  -500--    |        |       |
| 1134 | rs7523146   | 1          | 224696757 | C/T        | --   | --             | --            | --                  | --                | --         | --         | --       | --          | --          | 0            | 0.001       | LOC391168   | -3056  -500--    |        |       |
| 10   | rs10595876  | 1          | 224697133 | -TAAT      | --   | --             | --            | --                  | --                | --         | --         | --       | --          | --          | 0            | 0.001       | LOC391168   | -3432  -496--    |        |       |
| 815  | rs55869453  | 1          | 224697138 | -AATT      | --   | --             | --            | --                  | --                | --         | --         | --       | --          | --          | NA           | NA          | LOC391168   | -3437  -496--    |        |       |
| 182  | rs12239573  | 1          | 224697413 | C/T        | --   | --             | --            | --                  | --                | --         | --         | --       | --          | --          | NA           | 0           | LOC391168   | -3712  -493-C    |        | 1     |
| 29   | rs10799351  | 1          | 224697439 | C/T        | --   | --             | --            | --                  | --                | --         | --         | --       | --          | --          | NA           | 0           | LOC391168   | -3738  -493--    |        |       |
| 776  | rs4653740   | 1          | 224697496 | A/G        | --   | --             | --            | --                  | --                | --         | --         | --       | --          | --          | NA           | 0           | LOC391168   | -3795  -493-G    |        | 0.784 |
| 1000 | rs13222059  | 1          | 224697553 | A/C        | --   | --             | --            | --                  | --                | --         | --         | --       | --          | --          | NA           | NA          | LOC391168   | -3851  -492--    |        |       |
| 25   | rs10753425  | 1          | 224697746 | A/G        | --   | --             | --            | --                  | --                | --         | --         | --       | --          | --          | 0            | 0.004       | LOC391168   | -4045  -490--    |        |       |
| 54   | rs10916000  | 1          | 224697772 | A/T        | --   | --             | --            | --                  | --                | --         | --         | --       | --          | --          | 0            | 0.015       | LOC391168   | -4071  -490--    |        |       |
| 653  | rs5243489   | 1          | 224697779 | -A         | --   | --             | --            | --                  | --                | --         | --         | --       | --          | --          | 0            | 0.101       | LOC391168   | -4078  -490--    |        |       |
| 621  | rs344835227 | 1          | 224697782 | -A         | --   | --             | --            | --                  | --                | --         | --         | --       | --          | --          | 0            | 0.137       | LOC391168   | -4081  -490--    |        |       |
| 172  | rs12026320  | 1          | 224697785 | A/T        | --   | --             | --            | --                  | --                | --         | --         | --       | --          | --          | 0            | 0.172       | LOC391168   | -4084  -490--    |        |       |
| 684  | rs3745850   | 1          | 224697785 | -A         | --   | --             | --            | --                  | --                | --         | --         | --       | --          | --          | 0            | 0.172       | LOC391168   | -4084  -490--    |        |       |
| 30   | rs10799352  | 1          | 224697805 | C/T        | --   | --             | --            | --                  | --                | --         | --         | --       | --          | --          | 0            | 0           | LOC391168   | -4191  -489--    |        | 0.579 |
| 88   | rs11578747  | 1          | 224698077 | C/T        | --   | --             | --            | --                  | --                | --         | --         | --       | --          | --          | 0            | 0.002       | LOC391168   | -4376  -487-T    |        |       |
| 628  | rs344913110 | 1          | 224698497 | -C         | --   | --             | --            | --                  | --                | --         | --         | --       | --          | --          | NA           | 0           | LOC391168   | -4796  -483--    |        |       |
| 91   | rs11579211  | 1          | 224698512 | G/T        | --   | --             | --            | --                  | --                | --         | --         | --       | --          | --          | NA           | 0.004       | LOC391168   | -4811  -482--    |        |       |
| 1066 | rs6674899   | 1          | 224698591 | C/T        | --   | --             | --            | --                  | --                | --         | --         | --       | --          | --          | 0            | 0.001       | LOC391168   | -4890  -482-C    |        | 0.55  |
| 65   | rs11304898  | 1          | 224698886 | -T         | --   | --             | --            | --                  | --                | --         | --         | --       | --          | --          | NA           | 0.096       | LOC391168   | -5185  -479--    |        |       |
| 273  | rs17518706  | 1          | 224699036 | C/G        | --   | --             | --            | --                  | --                | --         | --         | --       | --          | --          | 0            | 0           | LOC391168   | -5335  -477-C    |        | 0.788 |
| 1078 | rs6883526   | 1          | 224699197 | C/T        | --   | --             | --            | --                  | --                | --         | --         | --       | --          | --          | 0.075157     | 0.009       | LOC391168   | -5496  -476-T    |        | 1     |
| 317  | rs1980370   | 1          | 224699553 | C/G        | --   | --             | --            | --                  | --                | --         | --         | --       | --          | --          | NA           | 0           | LOC391168   | -5852  -472-G    |        | 0.569 |
| 318  | rs1980371   | 1          | 224699695 | A/G        | --   | --             | --            | --                  | --                | --         | --         | --       | --          | --          | NA           | 0           | LOC391168   | -5994  -471--    |        |       |
| 183  | rs12239711  | 1          | 224699700 | A/C        | --   | --             | --            | --                  | --                | --         | --         | --       | --          | --          | NA           | 0           | LOC391168   | -5999  -470--    |        |       |
| 319  | rs1980372   | 1          | 224699825 | A/C        | --   | --             | --            | --                  | --                | --         | --         | --       | --          | --          | 0            | 0.001       | LOC391168   | -6124  -469-A    |        | 0.478 |
| 172  | rs12134025  | 1          | 224700089 | A/C        | --   | --             | --            | --                  | --                | --         | --         | --       | --          | --          | NA           | 0           | LOC391168   | -6388  -467-C    |        | 0.797 |
| 888  | rs7926170   | 1          | 224700137 | A/G        | --   | --             | --            | --                  | --                | --         | --         | --       | --          | --          | NA           | NA          | LOC391168   | -6436  -466--    |        |       |
| 320  | rs1983220   | 1          | 224700149 | A/G        | --   | --             | --            | --                  | --                | --         | --         | --       | --          | --          | NA           | 0           | LOC391168   | -6448  -466-A    |        | 0.598 |
| 321  | rs1983221   | 1          | 224700182 | C/G        | --   | --             | --            | --                  | --                | --         | --         | --       | --          | --          | NA           | 0           | LOC391168   | -6481  -466--    |        |       |
| 1151 | rs7535522   | 1          | 224700390 | C/T        | --   | --             | --            | --                  | --                | --         | --         | --       | --          | --          | NA           | 0           | LOC391168   | -6689  -464--    |        |       |
| 1193 | rs870000    | 1          | 224700647 | A/G        | --   | --             | --            | --                  | --                | --         | --         | --       | --          | --          | NA           | 0           | LOC391168   | -6946  -461-A    |        | 0.55  |
| 1154 | rs7535896   | 1          | 224700737 | C/T        | --   | --             | --            | --                  | --                | --         | --         | --       | --          | --          | NA           | 0           | LOC391168   | -7036  -460--    |        |       |
| 1194 | rs870001    | 1          | 224700842 | G/T        | --   | --             | --            | --                  | --                | --         | --         | --       | --          | --          | NA           | 0           | LOC391168   | -7141  -459--    |        |       |
| 728  | rs8705163   | 1          | 224701179 | G/T        | --   | --             | --            | --                  | --                | --         | --         | --       | --          | --          | NA           | 0.003       | LOC391168   | -7478  -456-G    |        | 1     |
| 1049 | rs6675325   | 1          | 224701897 | A/G        | --   | --             | --            | --                  | --                | --         | --         | --       | --          | --          | NA           | 0           | LOC391168   | -8448  -452-A    |        |       |
| 1084 | rs6909061   | 1          | 224701584 | A/G        | --   | --             | --            | --                  | --                | --         | --         | --       | --          | --          | NA           | 0           | LOC391168   | -7883  -452--    |        |       |
| 199  | rs12737487  | 1          | 224701628 | A/C        | --   | --             | --            | --                  | --                | --         | --         | --       | --          | --          | NA           | 0           | LOC391168   | -7927  -451-A    |        | 1     |
| 157  | rs12120169  | 1          | 224701836 | C/T        | --   | --             | --            | --                  | --                | --         | --         | --       | --          | --          | NA           | 0           | LOC391168   | -8135  -449--    |        |       |
| 158  | rs12120172  | 1          | 224701896 | C/T        | --   | --             | --            | --                  | --                | --         | --         | --       | --          | --          | NA           | 0           | LOC391168   | -8195  -449--    |        |       |
| 691  | rs35801490  | 1          | 224701901 | C/T        | --   | --             | --            | --                  | --                | --         | --         | --       | --          | --          | NA           | 0           | LOC391168   | -8200  -448--    |        |       |
| 165  | rs12130534  | 1          | 224701952 | C/T        | --   | --             | --            | --                  | --                | --         | --         | --       | --          | --          | NA           | 0           | LOC391168   | -8251  -448--    |        |       |
| 166  | rs12130568  | 1          | 224702114 | A/C        | --   | --             | --            | --                  | --                | --         | --         | --       | --          | --          | NA           | 0           | LOC391168   | -8413  -448-G    |        | 1     |
| 167  | rs12130601  | 1          | 224702181 | C/G        | --   | --             | --            | --                  | --                | --         | --         | --       | --          | --          | NA           | 0           | LOC391168   | -8480  -446--    |        |       |
| 836  | rs56268407  | 1          | 224702195 | A/G        | --   | --             | --            | --                  | --                | --         | --         | --       | --          | --          | NA           | NA          | LOC391168   | -8494  -446--    |        |       |
| 810  | rs55780700  | 1          | 224702197 | A/T        | --   | --             | --            | --                  | --                | --         | --         | --       | --          | --          | NA           | NA          | LOC391168   | -8496  -446--    |        |       |
| 111  | rs11805745  | 1          | 224702476 | C/T        | --   | --             | --            | --                  | --                | --         | --         | --       | --          | --          | NA           | 0           | LOC391168   | -8775  -443--    |        |       |
| 106  | rs11801008  | 1          | 224702477 | A/CA/G/T/G | --   | --             | --            | --                  | --                | --         | --         | --       | --          | --          | NA           | 0           | LOC391168   | -8776  -443--    |        |       |
| 112  | rs11805746  | 1          | 224702486 | C/T        | --   | --             | --            | --                  | --                | --         | --         | --       | --          | --          | NA           | 0           | LOC391168   | -8785  -443--    |        |       |
| 108  | rs11802418  | 1          | 224702514 | A/G        | --   | --             | --            | --                  | --                | --         | --         | --       | --          | --          | NA           | 0           | LOC391168   | -8813  -442--    |        |       |
| 113  | rs11805757  | 1          | 224702530 | C/T        | --   | --             | --            | --                  |                   |            |            |          |             |             |              |             |             |                  |        |       |

| No. | r    | Chromosome | Position | Allele    | TFBS       | Splicing(site) | Splicing(ESE) | Splicing(albolmirRNA) | mRaimirRNA | (Sangens)SNP | Stop Codon | Polyphen | SNPs3D(svm) | SNPs3D(svm) | RegPotential | Conservator | Nearby Gene | Distance (bp) | Allele | CEU   |     |
|-----|------|------------|----------|-----------|------------|----------------|---------------|-----------------------|------------|--------------|------------|----------|-------------|-------------|--------------|-------------|-------------|---------------|--------|-------|-----|
|     | 7    | rs10587217 | 1        | 224708644 | -/TGTG     |                |               |                       |            |              |            |          |             |             | 0.239883     | 0.002       | LOC391168   | -14943        | -38--  |       |     |
|     | 1180 | rs7551468  | 1        | 224708657 | C/T        |                |               |                       |            |              |            |          |             |             | 0.328602     | 0           | LOC391168   | -14956        | -38-T  | 1     |     |
|     | 1173 | rs7548822  | 1        | 224708738 | A/G        |                |               |                       |            |              |            |          |             |             | 0.006824     | 0           | LOC391168   | -15037        | -38-A  | 1     |     |
|     | 1152 | rs7553722  | 1        | 224708874 | A/G        |                |               |                       |            |              |            |          |             |             | 0            | 0           | LOC391168   | -15173        | -37-G  | 1     |     |
|     | 1174 | rs7548923  | 1        | 224708899 | A/G        |                |               |                       |            |              |            |          |             |             | 0            | 0.001       | LOC391168   | -15198        | -37-A  | 1     |     |
|     | 1167 | rs7544617  | 1        | 224708925 | C/G        |                |               |                       |            |              |            |          |             |             | 0.067564     | 0.001       | LOC391168   | -15224        | -37--  |       |     |
|     | 1175 | rs7549011  | 1        | 224708974 | A/G        |                |               |                       |            |              |            |          |             |             | 0.237412     | 0.001       | LOC391168   | -15273        | -37-A  | 1     |     |
|     | 1155 | rs7535909  | 1        | 224709041 | G/T        |                |               |                       |            |              |            |          |             |             | 0.106199     | 0.422       | LOC391168   | -15340        | -37--  |       |     |
|     | 352  | rs2222708  | 1        | 224709440 | G/A        |                |               |                       |            |              |            |          |             |             | NA           | 0           | LOC391168   | -15739        | -37--  |       |     |
|     | 251  | rs1527362  | 1        | 224709458 | G/A        |                |               |                       |            |              |            |          |             |             | NA           | 0           | 0.003       | LOC391168     | -15757 | -37-A | 0.8 |
|     | 605  | rs4582568  | 1        | 224709629 | -/T        |                |               |                       |            |              |            |          |             |             | 0            | 0           | LOC391168   | -15928        | -37--  |       |     |
|     | 194  | rs12723994 | 1        | 224710291 | C/T        |                |               |                       |            |              |            |          |             |             | NA           | 0           | LOC391168   | -16590        | -36--  |       |     |
|     | 96   | rs11583820 | 1        | 224710370 | A/G        |                |               |                       |            |              |            |          |             |             | 0            | 0.006       | LOC391168   | -16669        | -36-G  | 1     |     |
|     | 1196 | rs892347   | 1        | 224710903 | C/A        |                |               |                       |            |              |            |          |             |             | NA           | 0.001       | LOC391168   | -17202        | -35--  |       |     |
|     | 1217 | rs934461   | 1        | 224711230 | T/C        |                |               |                       |            |              |            |          |             |             | NA           | 0.004       | LOC391168   | -17529        | -35-T  | 1     |     |
|     | 338  | rs2056722  | 1        | 224711685 | A/C        |                |               |                       |            |              |            |          |             |             | 0.022438     | 0           | LOC391168   | -17984        | -35--  |       |     |
|     | 686  | rs35768271 | 1        | 224711685 | A/T/CG     |                |               |                       |            |              |            |          |             |             | 0.022438     | 0           | LOC391168   | -17984        | -35--  |       |     |
|     | 339  | rs2056723  | 1        | 224711686 | G/T        |                |               |                       |            |              |            |          |             |             | 0.017421     | 0           | LOC391168   | -17985        | -35-G  | 0.799 |     |
|     | 876  | rs5781431  | 1        | 224711971 | -/C        |                |               |                       |            |              |            |          |             |             | 0            | 0           | LOC391168   | -18270        | -34--  |       |     |
|     | 610  | rs34653384 | 1        | 224712235 | -/C        |                |               |                       |            |              |            |          |             |             | 0            | 0           | LOC391168   | -18534        | -34--  |       |     |
|     | 636  | rs34981482 | 1        | 224712483 | -/T        |                |               |                       |            |              |            |          |             |             | NA           | 0           | LOC391168   | -18782        | -34--  |       |     |
|     | 1079 | rs6683850  | 1        | 224714328 | C/G        |                |               |                       |            |              |            |          |             |             | NA           | 0           | LOC391168   | -20627        | -32--  |       |     |
|     | 566  | rs4027400  | 1        | 224715099 | -/T        |                |               |                       |            |              |            |          |             |             | 0            | 0.024       | LOC391168   | -21398        | -31--  |       |     |
|     | 730  | rs903558   | 1        | 224715140 | T/C        |                |               |                       |            |              |            |          |             |             | 0            | 0.001       | LOC391168   | -21591        | -31-T  | 1     |     |
|     | 1118 | rs750426   | 1        | 224715286 | A/G        |                |               |                       |            |              |            |          |             |             | 0            | 0           | LOC391168   | -21585        | -31-G  | 0.804 |     |
|     | 705  | rs36008250 | 1        | 224715545 | -/C        |                |               |                       |            |              |            |          |             |             | 0            | 0.002       | LOC391168   | -21844        | -31--  |       |     |
|     | 1092 | rs6701940  | 1        | 224715793 | A/T        |                |               |                       |            |              |            |          |             |             | NA           | 0           | LOC391168   | -22092        | -31-A  | 1     |     |
|     | 937  | rs59529467 | 1        | 224715801 | -/A        |                |               |                       |            |              |            |          |             |             | NA           | NA          | LOC391168   | -22100        | -30--  |       |     |
|     | 411  | rs3038788  | 1        | 224716013 | -/GTGTGTGT |                |               |                       |            |              |            |          |             |             | 0            | 0.008       | LOC391168   | -22312        | -30--  |       |     |
|     | 1002 | rs413654   | 1        | 224716021 | -/GTGTGTGT |                |               |                       |            |              |            |          |             |             | 0            | 0.01        | LOC391168   | -22310        | -30--  |       |     |
|     | 877  | rs5781432  | 1        | 224716031 | -/GTGTGTGT |                |               |                       |            |              |            |          |             |             | 0            | 0.036       | LOC391168   | -22330        | -30--  |       |     |
|     | 878  | rs5781433  | 1        | 224716032 | -/TGTG     |                |               |                       |            |              |            |          |             |             | 0            | 0.036       | LOC391168   | -22331        | -30--  |       |     |
|     | 903  | rs58367497 | 1        | 224716043 | -/GTGT     |                |               |                       |            |              |            |          |             |             | NA           | NA          | LOC391168   | -22342        | -30--  |       |     |
|     | 842  | rs56368077 | 1        | 224716045 | -/GTGTGTGT |                |               |                       |            |              |            |          |             |             | NA           | NA          | LOC391168   | -22344        | -30--  |       |     |
|     | 965  | rs60345908 | 1        | 224716098 | -/G        |                |               |                       |            |              |            |          |             |             | NA           | NA          | LOC391168   | -22397        | -30--  |       |     |
|     | 901  | rs58352107 | 1        | 224716216 | A/G        |                |               |                       |            |              |            |          |             |             | NA           | NA          | LOC391168   | -22515        | -30--  |       |     |
|     | 978  | rs60849995 | 1        | 224716331 | A/C        |                |               |                       |            |              |            |          |             |             | NA           | NA          | LOC391168   | -22601        | -29--  |       |     |
|     | 114  | rs11806408 | 1        | 224716460 | A/G        |                |               |                       |            |              |            |          |             |             | 0            | 0           | LOC391168   | -22759        | -30-G  | 0.758 |     |
|     | 1026 | rs61835431 | 1        | 224717204 | C/T        |                |               |                       |            |              |            |          |             |             | NA           | NA          | LOC391168   | -23503        | -29--  |       |     |
|     | 1055 | rs6663224  | 1        | 224717635 | C/T        |                |               |                       |            |              |            |          |             |             | 0            | 0.007       | LOC391168   | -23934        | -29--  |       |     |
|     | 565  | rs34016388 | 1        | 224718065 | -/A        |                |               |                       |            |              |            |          |             |             | NA           | 0.035       | LOC391168   | -24364        | -28--  |       |     |
|     | 626  | rs34874301 | 1        | 224718494 | -/T        |                |               |                       |            |              |            |          |             |             | NA           | 0           | LOC391168   | -24793        | -28--  |       |     |
|     | 972  | rs60588348 | 1        | 224718514 | C/T        |                |               |                       |            |              |            |          |             |             | NA           | NA          | LOC391168   | -24813        | -28--  |       |     |
|     | 953  | rs60011205 | 1        | 224718588 | A/G        |                |               |                       |            |              |            |          |             |             | NA           | NA          | LOC391168   | -24861        | -28--  |       |     |
|     | 673  | rs35570756 | 1        | 224718637 | -/C        |                |               |                       |            |              |            |          |             |             | NA           | 0           | LOC391168   | -24936        | -28--  |       |     |
|     | 189  | rs12566554 | 1        | 224719013 | A/G        |                |               |                       |            |              |            |          |             |             | NA           | 0           | LOC391168   | -25312        | -27--  |       |     |
|     | 1189 | rs838255   | 1        | 224719675 | C/T        |                |               |                       |            |              |            |          |             |             | NA           | 0           | LOC391168   | -25974        | -27--  |       |     |
|     | 1191 | rs866302   | 1        | 224719858 | A/C        |                |               |                       |            |              |            |          |             |             | NA           | 0.054       | LOC391168   | -26157        | -26-C  | 1     |     |
|     | 1027 | rs61835432 | 1        | 224719962 | A/T        |                |               |                       |            |              |            |          |             |             | NA           | NA          | LOC391168   | -26261        | -26--  |       |     |
|     | 779  | rs4653743  | 1        | 224720101 | G/T        |                |               |                       |            |              |            |          |             |             | 0            | 0           | LOC391168   | -26400        | -26-T  | 0.719 |     |
|     | 341  | rs2099380  | 1        | 224720875 | G/A        |                |               |                       |            |              |            |          |             |             | 0            | 0.003       | LOC391168   | -27174        | -25-G  | 0.857 |     |
|     | 133  | rs12033699 | 1        | 224721634 | A/G        |                |               |                       |            |              |            |          |             |             | 0.070774     | 0           | LOC391168   | -27933        | -25-A  | 0.75  |     |
|     | 830  | rs56150222 | 1        | 224721737 | A/G        |                |               |                       |            |              |            |          |             |             | NA           | NA          | LOC391168   | -28036        | -25--  |       |     |
|     | 987  | rs60986869 | 1        | 224722380 | A/G        |                |               |                       |            |              |            |          |             |             | NA           | NA          | LOC391168   | -28679        | -24--  |       |     |
|     | 998  | rs61242740 | 1        | 224722605 | A/G        |                |               |                       |            |              |            |          |             |             | NA           | NA          | LOC391168   | -28904        | -24--  |       |     |
|     | 146  | rs12081138 | 1        | 224722753 | G/T        |                |               |                       |            |              |            |          |             |             | 0            | 0.01        | LOC391168   | -29052        | -24-G  | 0.758 |     |
|     | 844  | rs56867172 | 1        | 224723044 | A/C        |                |               |                       |            |              |            |          |             |             | NA           | NA          | LOC391168   | -29343        | -23--  |       |     |
|     | 1190 | rs838256   | 1        | 224723603 | A/G        |                |               |                       |            |              |            |          |             |             | NA           | 0           | LOC391168   | -29501        | -23--  |       |     |
|     | 169  | rs12132162 | 1        | 224723720 | G/T        |                |               |                       |            |              |            |          |             |             | NA           | 0           | LOC391168   | -30019        | -23--  |       |     |
|     | 611  | rs34671162 | 1        | 224723861 | -/A        |                |               |                       |            |              |            |          |             |             | NA           | 0           | LOC391168   | -30160        | -22--  |       |     |
|     | 57   | rs10916003 | 1        | 224724473 | C/T        |                |               |                       |            |              |            |          |             |             | NA           | 0           | LOC391168   | -30772        | -22--  |       |     |
|     | 905  | rs58467003 | 1        | 224724497 | -/CA       |                |               |                       |            |              |            |          |             |             | NA           | NA          | LOC391168   | -30796        | -22--  |       |     |
|     | 940  | rs59564001 | 1        | 224724500 | -/C        |                |               |                       |            |              |            |          |             |             | NA           | NA          | LOC391168   | -30799        | -22--  |       |     |
|     | 820  | rs59990123 | 1        | 224724667 | C/T        |                |               |                       |            |              |            |          |             |             | NA           | NA          | LOC391168   | -30966        | -22--  |       |     |
|     | 598  | rs34889726 | 1        | 224725905 | A/G        |                |               |                       |            |              |            |          |             |             | NA           | 0           | LOC391168   | -32658        | -22--  |       |     |
|     | 180  | rs12145479 | 1        | 224726547 | C/T        |                |               |                       |            |              |            |          |             |             | NA           | 0.037       | LOC391168   | -32846        | -20--  |       |     |
|     | 1061 | rs6668071  | 1        | 224726548 | C/T        |                |               |                       |            |              |            |          |             |             | NA           | 0.025       | LOC391168   | -32847        | -20-C  | 0.825 |     |
|     | 932  | rs59334743 | 1        | 224727885 | C/G        |                |               |                       |            |              |            |          |             |             | NA           | NA          | LOC391168   | -34184        | -18--  |       |     |
|     | 1074 | rs6679800  | 1        | 224728002 | C/T        |                |               |                       |            |              |            |          |             |             | 0            | 0           | LOC391168   | -34301        | -18-T  | 0.748 |     |
|     | 707  | rs36036817 | 1        | 224728358 | -/C        |                |               |                       |            |              |            |          |             |             | NA           | 0           | LOC391168   | -34657        | -18--  |       |     |
|     | 1142 | rs7529182  | 1        | 224728576 | C/T        |                |               |                       |            |              |            |          |             |             | NA           | 0.001       | LOC391168   | -34875        | -18-C  | 1     |     |
|     | 139  | rs12059438 | 1        | 224729052 | C/T        |                |               |                       |            |              |            |          |             |             | 0            | 0.002       | LOC391168   | -35261        | -17--  |       |     |
|     | 897  | rs58208926 | 1        | 224729410 | A/G        |                |               |                       |            |              |            |          |             |             | NA           | NA          | LOC391168   | -35709        | -17--  |       |     |
|     | 31   | rs10799353 | 1        | 224729422 | A/G        |                |               |                       |            |              |            |          |             |             | 0            | 0           | LOC391168   | -35721        | -17-G  | 0.856 |     |
|     | 148  | rs12086631 | 1        | 224729714 | A/G        |                |               |                       |            |              |            |          |             |             | 0            | 0.004       | LOC391168   | -36013        | -17-A  | 1     |     |
|     | 32   | rs10799354 | 1        | 224730517 | G/T        |                |               |                       |            |              |            |          |             |             | NA           | 0           | LOC391168   | -36816        | -16--  |       |     |
|     | 1166 | rs7543019  | 1        | 224731365 | A/G        |                |               |                       |            |              |            |          |             |             | 0            | 0.004       | LOC391168   | -37664        | -15--  |       |     |
|     | 819  | rs59984505 | 1        | 224731557 | A/G        |                |               |                       |            |              |            |          |             |             | NA           | NA          | LOC391168   | -37856        | -15--  |       |     |
|     | 33   | rs10799355 | 1        | 224731907 | A/G        |                |               |                       |            |              |            |          |             |             | 0            | 0           | LOC391168   | -38266        | -14-G  | 0.508 |     |
|     | 695  | rs35830721 | 1        | 224732135 | C/T        |                |               |                       |            |              |            |          |             |             | NA           | 0           | LOC391168   | -38434        | -14--  |       |     |
|     | 613  | rs34696987 | 1        | 224732618 | -/T        |                |               |                       |            |              |            |          |             |             | NA           | 0           | LOC391168   | -38917        | -14--  |       |     |
|     | 1085 | rs6693596  | 1        | 224732756 | A/G        |                |               |                       |            |              |            |          |             |             | NA           | 0           | LOC391168   | -39055        | -14--  |       |     |
|     | 1083 | rs6688955  | 1        | 224732870 | C/G        |                |               |                       |            |              |            |          |             |             | NA           | 0           | LOC391168   | -39169        | -13--  |       |     |
|     | 138  | rs12057553 | 1        | 224733297 | C/T        |                |               |                       |            |              |            |          |             |             | NA           | 0           | LOC391168   | -39596        | -13--  |       |     |
|     | 72   | rs11365427 | 1        | 224733550 | -/T        |                |               |                       |            |              |            |          |             |             | NA           | 0           | LOC391168   | -39649        | -13--  |       |     |
|     | 893  | rs58049225 | 1        | 224733359 | -/T        |                |               |                       |            |              |            |          |             |             |              |             |             |               |        |       |     |

| No.  | rs          | Chromosome | Position  | Allele    | TFBS | Splicing(site) | Splicing(ESE) | Splicing(abolimRNA) | miRaimRNA | (miRaimRNA) | SangensSNP | Stop Codon | Polyphen | SNPs3D(svm) | SNPs3D(svm) | RegPotential | Conservator | Nearby Gene | Distance (bp) | Allele | CEU   |
|------|-------------|------------|-----------|-----------|------|----------------|---------------|---------------------|-----------|-------------|------------|------------|----------|-------------|-------------|--------------|-------------|-------------|---------------|--------|-------|
| 1222 | rs990618    | 1          | 224745007 | T/C       |      |                |               |                     |           |             |            |            |          |             |             | 0.241912     | 0.017       | LOC391168   | -513061 -17C  |        | 0.784 |
| 3    | rs1037767   | 1          | 224745091 | G/A       |      |                |               |                     |           |             |            |            |          |             |             | 0.185972     | 0.005       | LOC391168   | -513090 -17G  |        | 0.902 |
| 73   | rs3497828   | 1          | 224745093 | G/A       |      |                |               |                     |           |             |            |            |          |             |             | 0.190156     | 0.006       | LOC391168   | -513091 -17G  |        | 1     |
| 129  | rs12028490  | 1          | 224745186 | C/T       |      |                |               |                     |           |             |            |            |          |             |             | 0.216579     | 0           | LOC391168   | -514851 -16C  |        | 0.875 |
| 879  | rs5781434   | 1          | 224745714 | -TT       |      |                |               |                     |           |             |            |            |          |             |             | NA           | 0.001       | LOC391168   | -520131 -10-  |        |       |
| 410  | rs3038766   | 1          | 224745716 | -TT       |      |                |               |                     |           |             |            |            |          |             |             | NA           | 0           | LOC391168   | -520151 -10-  |        |       |
| 880  | rs5781435   | 1          | 224745722 | -TT       |      |                |               |                     |           |             |            |            |          |             |             | NA           | 0           | LOC391168   | -520211 -10-  |        |       |
| 591  | rs34315923  | 1          | 224745724 | -TT       |      |                |               |                     |           |             |            |            |          |             |             | NA           | 0           | LOC391168   | -520231 -10-  |        |       |
| 870  | rs57806038  | 1          | 224745729 | -TT       |      |                |               |                     |           |             |            |            |          |             |             | NA           | NA          | LOC391168   | -520281 -10-  |        |       |
| 909  | rs58574991  | 1          | 224745729 | -T        |      |                |               |                     |           |             |            |            |          |             |             | NA           | NA          | LOC391168   | -520381 -10-  |        |       |
| 857  | rs57905561  | 1          | 224745799 | A/G       |      |                |               |                     |           |             |            |            |          |             |             | NA           | NA          | LOC391168   | -520981 -10-  |        |       |
| 344  | rs2126330   | 1          | 224746231 | T/A       |      |                |               |                     |           |             |            |            |          |             |             | NA           | 0           | LOC391168   | -525301 -56T  |        | 0.742 |
| 373  | rs2377012   | 1          | 224746620 | T/C       |      |                |               |                     |           |             |            |            |          |             |             | NA           | 0           | LOC391168   | -529191 -17-  |        |       |
| 372  | rs2377011   | 1          | 224746626 | T/C       |      |                |               |                     |           |             |            |            |          |             |             | NA           | 0           | LOC391168   | -529251 -17-  |        |       |
| 1182 | rs7553164   | 1          | 224747100 | C/T       |      |                |               |                     |           |             |            |            |          |             |             | NA           | 0           | LOC391169   | 3011 4579 -   |        |       |
| 793  | rs5074714   | 1          | 224747242 | C/A       |      |                |               |                     |           |             |            |            |          |             |             | NA           | 0           | LOC391169   | 4483 4437 C   |        | 0.712 |
| 1186 | rs7555942   | 1          | 224747578 | C/G       |      | Y              |               |                     |           |             |            |            |          |             |             | 0.237259     | 1           | LOC391169   | 7791 4402 -   |        |       |
| 781  | rs46653746  | 1          | 224747951 | G/T       |      |                |               |                     |           |             |            |            |          |             |             | NA           | 0           | LOC391169   | 1152 3728 G   |        | 1     |
| 668  | rs35511976  | 1          | 224748091 | -C        |      |                |               |                     |           |             |            |            |          |             |             | NA           | 0           | LOC391169   | 1292 3588 -   |        |       |
| 782  | rs46653747  | 1          | 224748450 | A/G       |      |                |               |                     |           |             |            |            |          |             |             | NA           | 0           | LOC391169   | 1651 3229 A   |        | 0.675 |
| 1126 | rs75521449  | 1          | 224748671 | C/T       |      |                |               |                     |           |             |            |            |          |             |             | NA           | 0           | LOC391169   | 1872 3008 T   |        | 1     |
| 787  | rs471140    | 1          | 224748919 | G/C       |      |                |               |                     |           |             |            |            |          |             |             | NA           | 0           | LOC391169   | 2120 2760 G   |        | 0.442 |
| 676  | rs35646747  | 1          | 224749090 | -G        |      |                |               |                     |           |             |            |            |          |             |             | NA           | 0           | LOC391169   | 2291 2589 -   |        |       |
| 119  | rs12022045  | 1          | 224749397 | A/G       |      |                |               |                     |           |             |            |            |          |             |             | NA           | 0           | LOC391169   | 2598 2282 -   |        |       |
| 140  | rs12060141  | 1          | 224749494 | C/T       |      |                |               |                     |           |             |            |            |          |             |             | 0            | 0.001       | LOC391169   | 2695 2185 T   |        | 1     |
| 1030 | rs161836960 | 1          | 224749785 | C/T       |      |                |               |                     |           |             |            |            |          |             |             | NA           | NA          | LOC391169   | 2986 1894 -   |        |       |
| 865  | rs57537840  | 1          | 224749862 | C/T       |      |                |               |                     |           |             |            |            |          |             |             | NA           | NA          | LOC391169   | 3063 1817 -   |        |       |
| 186  | rs12402021  | 1          | 224749874 | C/T       |      |                |               |                     |           |             |            |            |          |             |             | 0            | 0.002       | LOC391169   | 3075 1805 T   |        | 0.679 |
| 887  | rs57900239  | 1          | 224750680 | C/T       | Y    |                |               |                     |           |             |            |            |          |             |             | NA           | NA          | LOC391169   | 3881 1999 -   |        |       |
| 265  | rs16846027  | 1          | 224750782 | C/G       | Y    |                |               |                     |           |             |            |            |          |             |             | 0.195031     | 0.001       | LOC391169   | 3983 1472 -   |        | 0.806 |
| 109  | rs11803235  | 1          | 224751966 | C/G       | Y    |                |               |                     |           |             |            |            |          |             |             | 0.043759     | 0           | LOC391169   | -287  -511S-  |        |       |
| 110  | rs11803600  | 1          | 224752438 | C/T       | Y    |                |               |                     |           |             |            |            |          |             |             | 0.129674     | 0           | LOC391169   | -759  -5068-  |        |       |
| 986  | rs60983859  | 1          | 224752495 | A/G       | Y    |                |               |                     |           |             |            |            |          |             |             | NA           | NA          | LOC391169   | -816  -5062-  |        |       |
| 635  | rs34979757  | 1          | 224752549 | -CA       |      |                |               |                     |           |             |            |            |          |             |             | 0.030477     | 0.362       | LOC391169   | -870  -5057-  |        |       |
| 627  | rs34898021  | 1          | 224752733 | -T        |      |                |               |                     |           |             |            |            |          |             |             | 0            | 0           | LOC391169   | -1054  -503-  |        |       |
| 959  | rs60211173  | 1          | 224753551 | A/G       | Y    |                |               |                     |           |             |            |            |          |             |             | NA           | NA          | LOC391169   | -1872  -495-  |        |       |
| 76   | rs11397262  | 1          | 224753569 | -T        |      |                |               |                     |           |             |            |            |          |             |             | NA           | 0           | LOC391169   | -1893  -492-  |        |       |
| 567  | rs34034769  | 1          | 224753594 | -T        |      |                |               |                     |           |             |            |            |          |             |             | NA           | 0           | LOC391169   | -1915  -495-  |        |       |
| 988  | rs610381    | 1          | 224753605 | T/C       | Y    |                |               |                     |           |             |            |            |          |             |             | NA           | 0           | LOC391169   | -1926  -495-  |        |       |
| 118  | rs12021546  | 1          | 224753770 | A/G       | Y    |                |               |                     |           |             |            |            |          |             |             | NA           | 0           | LOC391169   | -2091  -493-  |        |       |
| 926  | rs59174388  | 1          | 224753871 | C/T       | Y    |                |               |                     |           |             |            |            |          |             |             | NA           | NA          | LOC391169   | -2192  -492-  |        |       |
| 22   | rs1070489   | 1          | 224754976 | A/C       | Y    |                |               |                     |           |             |            |            |          |             |             | NA           | 0           | LOC391169   | -3297  -481-  |        |       |
| 991  | rs61060851  | 1          | 224755139 | A/C       | Y    |                |               |                     |           |             |            |            |          |             |             | NA           | NA          | LOC391169   | -3460  -479-  |        |       |
| 1220 | rs9725505   | 1          | 224755377 | A/T       | Y    |                |               |                     |           |             |            |            |          |             |             | NA           | 0           | LOC391169   | -3693  -477-  |        |       |
| 1224 | rs970893    | 1          | 224755573 | A/C       | Y    |                |               |                     |           |             |            |            |          |             |             | NA           | 0           | LOC391169   | -3894  -475-  |        |       |
| 1221 | rs9725523   | 1          | 224755685 | A/G       | Y    |                |               |                     |           |             |            |            |          |             |             | NA           | 0           | LOC391169   | -4006  -474-  |        |       |
| 843  | rs56378608  | 1          | 224756483 | -ATTA     |      |                |               |                     |           |             |            |            |          |             |             | NA           | NA          | LOC391169   | -4804  -466-  |        |       |
| 204  | rs12742720  | 1          | 224756511 | C/T       | Y    |                |               |                     |           |             |            |            |          |             |             | NA           | 0           | LOC391169   | -4832  -466-  |        |       |
| 409  | rs28859305  | 1          | 224756560 | G/T       | Y    |                |               |                     |           |             |            |            |          |             |             | NA           | 0           | LOC391169   | -4881  -465-  |        |       |
| 1223 | rs9970444   | 1          | 224757150 | G/T       |      |                |               |                     |           |             |            |            |          |             |             | NA           | 0           | LOC391169   | -5471  -459-  |        |       |
| 1038 | rs632199    | 1          | 224757236 | A/G       |      |                |               |                     |           |             |            |            |          |             |             | NA           | 0           | LOC391169   | -5557  -458-  |        |       |
| 21   | rs1070468   | 1          | 224757329 | A/G       |      |                |               |                     |           |             |            |            |          |             |             | NA           | 0           | LOC391169   | -5650  -457-  |        |       |
| 912  | rs58770379  | 1          | 224757420 | C/T       |      |                |               |                     |           |             |            |            |          |             |             | NA           | NA          | LOC391169   | -5741  -457-  |        |       |
| 1048 | rs6659305   | 1          | 224757718 | A/T       |      |                |               |                     |           |             |            |            |          |             |             | NA           | 0           | LOC391169   | -6039  -454-  |        |       |
| 1053 | rs6662365   | 1          | 224757720 | C/T       |      |                |               |                     |           |             |            |            |          |             |             | NA           | 0           | LOC391169   | -6041  -454-  |        |       |
| 970  | rs60520763  | 1          | 224757859 | A/G       |      |                |               |                     |           |             |            |            |          |             |             | NA           | NA          | LOC391169   | -6180  -452-  |        |       |
| 212  | rs12749449  | 1          | 224758270 | G/T       |      |                |               |                     |           |             |            |            |          |             |             | NA           | 0           | LOC391169   | -6591  -448-  |        |       |
| 145  | rs12079751  | 1          | 224758637 | C/T       |      |                |               |                     |           |             |            |            |          |             |             | NA           | 0           | LOC391169   | -6953  -444-  |        |       |
| 797  | rs546143    | 1          | 224758996 | G/T       |      |                |               |                     |           |             |            |            |          |             |             | NA           | 0           | LOC391169   | -7317  -441-  |        |       |
| 1087 | rs6697392   | 1          | 224759145 | A/G       |      |                |               |                     |           |             |            |            |          |             |             | NA           | 0           | LOC391169   | -7466  -439-  |        |       |
| 798  | rs550705    | 1          | 224759471 | G/A       |      |                |               |                     |           |             |            |            |          |             |             | 0            | 0           | LOC391169   | -7792  -436G  |        | 0.804 |
| 606  | rs34585511  | 1          | 224760134 | -A        |      |                |               |                     |           |             |            |            |          |             |             | 0            | 0.52        | LOC391169   | -8455  -429-  |        |       |
| 1137 | rs7524430   | 1          | 224760165 | C/T       |      |                |               |                     |           |             |            |            |          |             |             | 0            | 0.001       | LOC391169   | -8486  -429T  |        | 0.911 |
| 869  | rs7773856   | 1          | 224760379 | C/T       |      |                |               |                     |           |             |            |            |          |             |             | NA           | NA          | LOC391169   | -8700  -427-  |        |       |
| 418  | rs3088502   | 1          | 224760770 | -TA       |      |                |               |                     |           |             |            |            |          |             |             | NA           | 0           | LOC391169   | -9083  -417C  |        |       |
| 881  | rs5781436   | 1          | 224760775 | -TA       |      |                |               |                     |           |             |            |            |          |             |             | NA           | 0           | LOC391169   | -9096  -423-  |        |       |
| 602  | rs34547587  | 1          | 224760776 | -TA       |      |                |               |                     |           |             |            |            |          |             |             | NA           | 0           | LOC391169   | -9097  -423-  |        |       |
| 568  | rs34042195  | 1          | 224760786 | -AT       |      |                |               |                     |           |             |            |            |          |             |             | NA           | 0           | LOC391169   | -9107  -423-  |        |       |
| 882  | rs5781437   | 1          | 224760793 | -AT       |      |                |               |                     |           |             |            |            |          |             |             | NA           | 0           | LOC391169   | -9114  -423-  |        |       |
| 581  | rs34227459  | 1          | 224760794 | -AT       |      |                |               |                     |           |             |            |            |          |             |             | NA           | 0           | LOC391169   | -9115  -423-  |        |       |
| 261  | rs16759796  | 1          | 224760795 | -TTATAT/C |      |                |               |                     |           |             |            |            |          |             |             | NA           | 0           | LOC391169   | -9116  -423-  |        |       |
| 20   | rs10701361  | 1          | 224760804 | -TA       |      |                |               |                     |           |             |            |            |          |             |             |              |             |             |               |        |       |





| No.  | rs         | Chromosome | Position  | Allele | TFBS | Splicing(site) | Splicing(ESE) | Splicing(abolimiRNA) | (miRaimiRNA) | (Sangrens) | SNP | Stop Codon | Polyphen | SNPs3D(svm) | SNPs3D(svm) | RegPotential | Conservator | Nearby Gene | Distance (bp) | Allele  | CEU   |
|------|------------|------------|-----------|--------|------|----------------|---------------|----------------------|--------------|------------|-----|------------|----------|-------------|-------------|--------------|-------------|-------------|---------------|---------|-------|
| 786  | rs4653751  | 1          | 224807907 | A/T    | --   | --             | --            | --                   | --           | --         | --  | --         | --       | --          | --          | 0            | 0.001       | C1orf95     | 4783          | 5201:A  | 0.865 |
| 813  | rs55847313 | 1          | 224808084 | G/T    | --   | --             | --            | --                   | --           | --         | --  | --         | --       | --          | --          | NA           | NA          | C1orf95     | 4960          | 5184:-- | --    |
| 933  | rs55336089 | 1          | 224808368 | A/G    | --   | --             | --            | --                   | --           | --         | --  | --         | --       | --          | --          | NA           | NA          | C1orf95     | 5244          | 5155:-- | --    |
| 1047 | rs665165   | 1          | 224808380 | A/G    | --   | --             | --            | --                   | --           | --         | --  | --         | --       | --          | --          | 0.12709      | 0           | C1orf95     | 5256          | 5154:A  | 0.995 |
| 767  | rs4653452  | 1          | 224808499 | C/G    | --   | --             | --            | --                   | --           | --         | --  | --         | --       | --          | --          | 0.042753     | 0.002       | C1orf95     | 5375          | 5142:G  | 0.878 |
| 995  | rs61184345 | 1          | 224808755 | A/G    | --   | --             | --            | --                   | --           | --         | --  | --         | --       | --          | --          | NA           | NA          | C1orf95     | 5631          | 5117:-- | --    |
| 1065 | rs667462   | 1          | 224808936 | A/G    | --   | --             | --            | --                   | --           | --         | --  | --         | --       | --          | --          | 0            | 0           | C1orf95     | 5812          | 5099:-- | --    |
| 1095 | rs680886   | 1          | 224809543 | A/T    | --   | --             | --            | --                   | --           | --         | --  | --         | --       | --          | --          | 0.154213     | 0           | C1orf95     | 6419          | 5038:T  | 0.9   |
| 1108 | rs708745   | 1          | 224809786 | A/G    | --   | --             | --            | --                   | --           | --         | --  | --         | --       | --          | --          | 0.157701     | 0           | C1orf95     | 6662          | 5014:G  | 0.884 |
| 805  | rs55732142 | 1          | 224809834 | -/TT   | --   | --             | --            | --                   | --           | --         | --  | --         | --       | --          | --          | NA           | NA          | C1orf95     | 6710          | 5000:-- | --    |
| 631  | rs34944881 | 1          | 224810342 | -/T    | --   | --             | --            | --                   | --           | --         | --  | --         | --       | --          | --          | 0            | 0.026       | C1orf95     | 7218          | 4958:-- | --    |
| 689  | rs35782358 | 1          | 224810425 | -/T    | --   | --             | --            | --                   | --           | --         | --  | --         | --       | --          | --          | 0            | 0.006       | C1orf95     | 7301          | 4950:-- | --    |
| 1162 | rs7540638  | 1          | 224810450 | A/G    | --   | --             | --            | --                   | --           | --         | --  | --         | --       | --          | --          | 0            | 0           | C1orf95     | 7326          | 4947:A  | 0.892 |
| 919  | rs588782   | 1          | 224810762 | C/T    | --   | --             | --            | --                   | --           | --         | --  | --         | --       | --          | --          | NA           | NA          | C1orf95     | 7638          | 4916:-- | --    |
| 1163 | rs7540952  | 1          | 224810801 | A/G    | --   | --             | --            | --                   | --           | --         | --  | --         | --       | --          | --          | NA           | NA          | C1orf95     | 7677          | 4912:G  | 0.992 |
| 101  | rs11587124 | 1          | 224811256 | A/G    | --   | --             | --            | --                   | --           | --         | --  | --         | --       | --          | --          | NA           | NA          | C1orf95     | 8132          | 4867:A  | 1     |
| 589  | rs34301660 | 1          | 224811639 | -/T    | --   | --             | --            | --                   | --           | --         | --  | --         | --       | --          | --          | NA           | NA          | C1orf95     | 8515          | 4825:-- | --    |
| 257  | rs1587418  | 1          | 224811716 | G/C    | --   | --             | --            | --                   | --           | --         | --  | --         | --       | --          | --          | NA           | NA          | C1orf95     | 8592          | 4821:-- | --    |
| 1109 | rs708746   | 1          | 224811764 | A/C    | --   | --             | --            | --                   | --           | --         | --  | --         | --       | --          | --          | NA           | NA          | C1orf95     | 8640          | 4816:C  | 1     |
| 851  | rs571499   | 1          | 224811969 | A/C    | --   | --             | --            | --                   | --           | --         | --  | --         | --       | --          | --          | NA           | NA          | C1orf95     | 8845          | 4795:-- | --    |

Tagged SNP in green  
SNP within PARR1 coded yellow
